1 **Ionizing radiation induces stem cell-like properties in a caspase-dependent manner in**  
2 ***Drosophila***

3

4 **Shilpi Verghese and Tin Tin Su<sup>1\*</sup>**

5

6 Department of Molecular, Cellular and Developmental Biology, 347 UCB,

7 University of Colorado, Boulder, CO 80309-0347

8

9 <sup>1</sup>University of Colorado Comprehensive Cancer Center,

10 Anschutz Medical Campus, 13001 E. 17th Pl., Aurora, CO 80045

11

12 \*Corresponding author, Lead Contact:

13 [tin.su@colorado.edu](mailto:tin.su@colorado.edu)

14 Phone: 303-735-3245

15

16 Key words: *Drosophila*, regeneration, ionizing radiation, caspase, apoptosis

17

18 Short title: Cell fate plasticity after radiation damage

19

20 **ABSTRACT**

21 Cancer treatments including ionizing radiation (IR) can induce cancer stem cell-like properties in  
22 non-stem cancer cells, an outcome that can interfere with therapeutic success. Yet, we  
23 understand little about what consequences of IR induces stem cell like properties and why  
24 some cancer cells show this response but not others. In previous studies, we identified a pool of  
25 epithelial cells in *Drosophila* larval wing discs that display IR-induced stem cell-like properties.  
26 These cells are resistant to killing by IR and, after radiation damage, change fate and translocate  
27 to regenerate parts of the disc that suffered more cell death. Here, we addressed how IR  
28 exposure results in the induction of stem cell-like behavior, and found a requirement for  
29 caspase activity. Unexpectedly, this requirement was mapped to the regenerative cells,  
30 suggesting a non-apoptotic role for caspases in the induction of stem cell-like behavior. We also  
31 performed a systematic probing of different regions of the wing disc by lineage tracing, in order  
32 to identify additional pools of cells with IR-induced regenerative properties. We identified two  
33 new populations of such cells. Unlike the original pool that helps regenerate the disc, the new  
34 pools of cells undergo abnormal regeneration to produce an ectopic, supernumerary wing disc.  
35 We also identified cells that lack the ability to display IR-induced regenerative behavior.  
36 Identification of different cell populations with different IR-induced regenerative potential will  
37 allow us to probe the molecular basis for these differences in the future.

38

39

40 **AUTHOR SUMMARY**

41 Ionizing Radiation (IR), alone or in combination with other therapies, is used to treat an  
42 estimated half of all cancer patients. Yet, we understand little about why some tumors cells  
43 respond to treatment while others grow back (regenerate). We identified specific pools of cells  
44 within a *Drosophila* organ that are capable of regeneration after damage by IR. We also  
45 identified what it is about IR damage that allows these cells to regenerate. These results help us  
46 understand how cells regenerate after IR damage and will aid in designing better therapies that  
47 involve radiation.

## 48 INTRODUCTION

49 Regeneration is essential to tissue homeostasis and health. Conversely, regeneration of tumors  
50 after treatment leads to tumor recurrence and treatment failure. Understanding mechanisms  
51 that underlie regeneration is therefore important not only for understanding basic biology but  
52 also for optimizing treatment of diseases like cancer. Our understanding of regeneration has  
53 benefited immensely from experimental systems with dedicated stem cells that form the  
54 cellular basis for regeneration. Examples include regeneration of vertebrate gut and *Drosophila*  
55 intestine [1-3]. Tissues also regenerate despite the lack of a dedicated stem cell pool. A prime  
56 example is the vertebrate liver, which regenerates by proliferation of the surviving cells of each  
57 cell type [4-6]. If proliferation of hepatocytes is blocked during liver regeneration, however,  
58 biliary epithelial cells can dedifferentiate, proliferate and re-differentiate into hepatocytes [4-  
59 6]. Such plasticity has been documented in other mammalian organs [7-9], and in some models  
60 of amphibian limb and fish fin regeneration [10]. This report addresses the molecular basis for  
61 cell fate plasticity during regeneration using *Drosophila* larval cells as a model.

62

63 *Drosophila* larval imaginal discs are precursors of adult organs. Imaginal discs lack a dedicated  
64 stem cell pool yet can regenerate fully even after surgical ablation of 25% of the disc, after  
65 genetic ablation of a disc compartment (e.g. the anterior compartment), or after exposure to  
66 doses of ionizing radiation (IR) that kills about half of the cells [11, 12]. We recently identified a  
67 previously unknown mode of regeneration in *Drosophila* larval wing discs, whereby epithelial  
68 cells acquire stem cell-like properties during regeneration after damage by IR [13]. These  
69 properties include resistance to killing by IR, the ability to change cell fate, and the ability to

70 translocate to areas of the wing disc with greater need for cell replenishment. The ability to  
71 behave like stem cells in response to IR is limited to certain cells within the continuous  
72 epithelium of the wing disc. Specifically, a subset of future hinge cells is protected from IR-  
73 induced apoptosis by the action of STAT92E (*Drosophila* STAT3/5, to be called 'STAT' hereafter)  
74 and Wg (Dm Wnt1)-mediated repression of pro-apoptotic gene *reaper*. These hinge cells  
75 change their fate and translocate to the pouch region that suffers more apoptosis and  
76 participate in regenerating the pouch. Without IR, these cells differentiate into the adult wing  
77 hinge, indicating the cell fate plasticity is IR-induced.

78  
79 In above-described studies, regeneration of the pouch by the hinge was observed in nearly all  
80 irradiated discs [13, 14]. In about 20% of irradiated discs, we observed, in addition, abnormal  
81 regeneration that produced an ectopic wing disc [14]. Ectopic discs were wing discs based on  
82 staining for the protein markers Ubx and Wg, and are composed of an ectopic pouch and an  
83 ectopic hinge [14]. Ectopic discs were neither duplications (e.g. not pouch-to-pouch) nor  
84 transdeterminations (e.g. not leg-to-wing) described in classical studies of regeneration after  
85 surgical ablation [15]. Our efforts to dissect the cellular origin for the ectopic discs showed that  
86 cells of the hinge that regenerate the pouch are unlikely to be responsible for ectopic discs [14].  
87 Therefore, we hypothesized that there are additional pools of cell in the wing disc that show  
88 stem cell like properties after IR damage by participating in abnormal regeneration to produce  
89 an ectopic wing disc.

90

91 Here, we report the mapping of cell lineages during regeneration of *Drosophila* larval wing discs  
92 following damage by X-rays, a type of IR. To express lineage tracers, we used FlyLight GAL4  
93 drivers that display simple expression patterns because they use small (~3kb) enhancers from  
94 various genes [16]. In addition to the subset of future hinge cells we previously identified as  
95 capable of behaving like stem cells [13], two more cell populations, in the notum and in the  
96 dorsal-posterior hinge/pleura region, were found to show this potential. While the previously  
97 identified hinge cells are responsible for normal regeneration to restore the wing disc, the  
98 newly identified regenerative cells undergo abnormal regeneration to produce ectopic discs.  
99 Cells of the pouch, we find, lack the capacity to acquire stem cell like properties and do not  
100 change fate or translocate. Of possible consequences of X-ray exposure, we identified caspase  
101 activity, as necessary for the hinge cells to acquire regenerative properties, and further localize  
102 this requirement to the regenerative cells.

103

104 IR-induced stem-ness in *Drosophila* parallels the increasingly appreciated ability of cancer  
105 treatments including IR to induce stem cell-like properties in non-stem cancer cells [17-20].  
106 Furthermore, within the continuous single layer columnar epithelium of the wing disc, only  
107 some cells respond to IR by exhibiting stem cell-like properties. This parallels how only a small  
108 subset of irradiated cancer cells exhibit stem cell-like properties. IR, alone or in combination  
109 with other therapies, is used to treat an estimated half of all cancer patients. Yet, we  
110 understand little about what consequences of IR induces stem cell like properties and why  
111 some cancer cells show this response but not others. This report describes similar phenomena  
112 in *Drosophila*, making it possible to identify and study the responsible genes in the future.

## 113 RESULTS

114 We are using the published G-trace system to monitor cell lineages in the larval wing discs [21].  
115 In this system, GAL4 drives the expression of UAS-RFP (real time marker) and UAS-FLP  
116 recombinase, which causes a recombination event to produce stable GFP expression (lineage  
117 marker). Thus, even if cells change fate and lose RFP expression, their clonal descendants would  
118 be marked with GFP (GFP<sup>+</sup>RFP<sup>-</sup>). We used G-trace to test a collection of GAL4 drivers, each  
119 active within a different subset of cells in *Drosophila* 3<sup>rd</sup> instar larval wing discs.

120

### 121 *Optimization of lineage tracing protocol*

122 30A-GAL4 was used in our recent studies and is active in a subset of hinge cells ([13, 14];  
123 reproduced in Fig 1A-C, J, L) and a small number (<10) of notum cells (arrows in Fig 1 J, L). The  
124 dynamics of 30A-GAL4 activity is such that cells expressing it show stable lineage; very few cells  
125 were GFP<sup>+</sup>RFP<sup>-</sup>. In contrast, another hinge driver, FlyLight R73G07-GAL4 produced GFP<sup>+</sup> cell in  
126 most of the disc including the pouch, the hinge, and most of the notum, even though RFP is  
127 restricted to the hinge in 3<sup>rd</sup> instar wing discs (Fig 1D-F). R73G07 is a 3028 bp enhancer from the  
128 *zfh2* locus and is apparently active in most cells of the wing disc before becoming restricted to  
129 the hinge. Zfh2 is a transcription factor important for wing development [22]. Temporal  
130 restriction of R73G07-GAL4 activity with its repressor GAL80<sup>ts</sup> according to the temperature  
131 shift protocol shown in Fig 1M confined GFP to the hinge and the pouch (Fig 1I). Increasing  
132 larval age from 4-5 days after egg laying (AED, Fig 1M) to 5-6 days AED before temperature shift  
133 to induce GAL4 did not reduce the GFP<sup>+</sup> domain any further. Further aging the larvae beyond 5-  
134 6 days AED before inducing GAL4 may help eliminate GFP in the pouch and restrict it to the

135 hinge, but this schedule is incompatible with our goal because we need to monitor  
136 regeneration for 72 h after IR before losing the larvae to pupariation.

137

138 These results illustrate that while some GAL4 drivers show stable lineage expression and could  
139 be used to monitor fate changes after irradiation, others show lineage changes without IR. This  
140 was confirmed using fifteen additional FlyLight GAL4 drivers (S1 Fig and figure legend).

141 Therefore, we used GAL80<sup>ts</sup> and the protocol shown in Fig 1M in all subsequent experiments  
142 with all GAL4 drivers, even if their lineages are stable as in the 30A-GAL4 example. We selected  
143 FlyLight drivers for their apparently exclusive expression in the disc region of interest. We find,  
144 however, that most show additional expression elsewhere in the disc, which would make  
145 interpretation of lineage results difficult. Therefore, in subsequent experiments, we used only  
146 the drivers that are expressed exclusively in cells of interest. Some GAL4 drivers are active in  
147 the cells of the peripodial membrane that covers the wing disc epithelium on the apical side,  
148 and in wing-disc associated tracheal cells on the basal side. In such cases, peripodial cells and  
149 tracheal cells can be identified based on their larger nuclear size compared to columnar  
150 epithelial cells and on their location in optical sections that book-end the columnar epithelium  
151 (S2 Fig). Our analyses focus on the columnar epithelium by excluding other optical sections.

152

153 Antibody staining shows that Zfh2 protein expression resembles R73G07-GAL4>RFP expression  
154 (compare Fig 1H and K). In contrast, 30A>RFP is expressed in only a subset of these cells  
155 (compare Fig 1K and L). Of relevance to subsequent sections is the expression of R73G07-GAL4



156 but not 30A-GAL4 in the dorsal-posterior region of the hinge and the pleura (arrow heads in Fig  
157 1J-L, N).

158

159 *Cells of the dorsal-posterior hinge and pleura change fate and translocate into the notum*

160 In our published studies of lineage tracing after irradiation, 30A-GAL4 expressing hinge cells  
161 translocated to the pouch but showed little movement dorsally towards the notum ([13, 14]  
162 and reproduced in Fig 7). We used 4000R of X-rays in this and all other experiments. This level  
163 of IR kills more than half of the cells but the discs could still regenerate to produce viable adults  
164 [11, 12]. In contrast to 30A-GAL4, R73G07-GAL4>G-trace experiments show GFP<sup>+</sup> cell  
165 populations that extend from the hinge dorsally along both the anterior and posterior margins  
166 of the wing disc (Fig 2 I-P). The extending GFP<sup>+</sup> cell population is contiguous with both the hinge  
167 (arrowheads) and the pleura (arrows in Fig 2F-H and Fig 2J-L; see fate map in Fig 1N). Some  
168 GFP<sup>+</sup> cells in the notum lack RFP (for example, Fig 2H) while others express RFP (for example,  
169 Fig 2L). In discs that show an ectopic disc (Fig 2M-P), many cells of the ectopic disc are  
170 GFP<sup>+</sup>RFP<sup>+</sup>. To better understand the source of GFP<sup>+</sup> cells in the notum, we repeated the  
171 experiment but analyzed the discs at different times after IR.

172

173 We analyzed *a single cohort* of R73G07>G-trace larvae at 24, 48 and 72 h after IR, in two  
174 independent time course experiments (Fig 3). At 24 h after IR, GFP<sup>+</sup>RFP<sup>+</sup> cells are seen  
175 spreading from the hinge (arrowhead) and the pleura (arrow) into the notum (Fig 3A-B,  
176 magnified in C). Such translocation is not seen in -IR samples (compare Fig 3C to Fig 2D). The  
177 retention of RFP in these cells could be due to the persistence of GAL4, RFP, or both proteins.

178 The half-life of GFP is 26 h in mammalian cells [23]. If the half-life of RFP in the wing disc is  
179 similar, these cells could have terminated RFP expression but still have RFP protein. The  
180 movement of hinge/pleura cells is seen along both the anterior and the posterior disc margins,  
181 but not in the central portion of the disc (Fig 3B). Such translocation of the hinge/pleura cells  
182 was seen in most discs (50/58 in two independent experiments). Of the remainder, three  
183 resembled -IR controls, that is, apparently without cell movements. The other five resembled  
184 what is described next for the 48 h time point.

185  
186 At 48 h after IR, about one fourth of discs show movement of hinge and pleura cells into the  
187 notum, similar to the 24 h disc shown in Fig 3A-C (7/26, two independent experiments). In the  
188 majority of the discs (17/26, two independent experiments), the number of GFP<sup>+</sup> cells in the  
189 notum increased, they are found deeper (more dorsal) in the notum, and most of these cells  
190 lacked RFP (Fig 3E-H). We interpret this to mean that cells continued to translocate from the  
191 R73G07-GAL4 domain and many of these have now lost their hinge fate as indicated by the lack  
192 of RFP. As in the 24 h discs, GFP<sup>+</sup> cell population in the notum appear contiguous with both the  
193 hinge (arrowhead) and the pleura (arrow, Fig 3 E, magnified in F). Moreover, GFP<sup>+</sup> cells in the  
194 notum were more numerous in the posterior half (post) than in the anterior half (ant) in some  
195 of the discs (Fig 3G, magnified in H), which may explain the finding that ectopic discs seen at 72  
196 h after IR always appear along the posterior wing margin (e.g. Fig 2M-P; [14]). The remaining  
197 two discs show RFP<sup>+</sup>GFP<sup>+</sup> cells deep in the notum and far from the hinge, similar to what is  
198 shown in Fig 2J.

199

200 At 72 h after IR, we again see different classes as previously seen in Fig 2. The majority  
201 resemble the ones in Fig 3D-H, with GFP<sup>+</sup>RFP<sup>-</sup> cells in the notum (46/65, two independent  
202 experiments). About 15% (10/65, two independent experiments) of the discs show GFP<sup>+</sup>RFP<sup>+</sup>  
203 cells deep in the notum and far from the R73G07-GAL4 domain. In some of these discs,  
204 GFP<sup>+</sup>RFP<sup>+</sup> cells are contained within the notum (similar to Fig 2J) while in others GFP<sup>+</sup>RFP<sup>+</sup> cells  
205 are in an ectopic disc (Fig 3I-O, see also Fig 2 M-P). Ectopic discs were not observed at earlier  
206 time points in the same cohort of larvae, indicating that ectopic disc growth occurs between 48  
207 and 74 h after IR, which is in agreement with our published results [14]. RFP<sup>+</sup>GFP<sup>+</sup> cells of the  
208 ectopic discs appear contiguous with cells of the hinge and the pleura (arrowhead and arrow,  
209 respectively, in Fig 3I-K). Of the remainder of the discs, eight resembled -IR controls and one  
210 resembled the disc shown for the 24 h time point in Fig 3A-C.

211

212 To summarize and interpret the time-course data, at 24 h after IR, GFP-marked cells of the  
213 hinge and the pleura are found in the notum but most of these cells retain RFP. At 48 h after IR,  
214 GFP<sup>+</sup> cells are found deeper (more dorsal) in the notum, they are more numerous than at 24 h  
215 and most have lost RFP. At 72 h after IR, while most of the discs resemble the 48 h discs, a  
216 significant fraction showed RFP in the GFP<sup>+</sup> cells in the notum. We interpret these data to mean  
217 that hinge/pleura cells translocated into the notum and lost their hinge/pleura fate, but that  
218 some of them re-gain the fate as they form ectopic discs. We cannot rule out the formal  
219 possibility that GFP<sup>+</sup>RFP<sup>+</sup> cells in the notum and ectopic discs at 72 h after IR formed de novo  
220 and bear no relation to the cells of the hinge and the pleura of the primary disc. But the finding  
221 that GFP<sup>+</sup>RFP<sup>+</sup> cells in the notum are contiguous with the primary hinge and the pleura,

222 combined with the sequence of events in the time course, make us favor the scenario of  
223 dynamic cell fate changes. In this interpretation, hinge cells that translocate into the notum  
224 originate from part the hinge that is outside the 30A domain (arrowheads in Fig 1J, L). This  
225 explains why we never saw cells of the 30A domain translocate into the notum in our previous  
226 studies [13, 14].

227

### 228 *Cells of the notum contribute to the ectopic disc*

229 Confocal imaging and close inspection of each optical section showed that ectopic discs include  
230 cells that lacked both RFP and GFP (Fig 3M-O, arrows). In these experiments, only cells that  
231 lacked RFP and GFP were notum cells, suggesting that cells of the notum also contribute to  
232 ectopic discs in addition to cells that originate from the hinge. We addressed this possibility  
233 directly by lineage-tracing with a notum-specific GAL4 driver (Fig 4).

234

235 R76A10-GAL4, bearing an enhancer fragment from the *tailup* locus, is active exclusively in a  
236 subset of notum cells (Fig 4A). Without IR, cell fate in this domain appears stable as GFP and  
237 RFP overlap (Fig 4A). At 72 h after IR, GFP/RFP overlap looks similar to -IR in most discs (Fig 4B).  
238 The exceptions are irradiated discs with ectopic growths, where we observed an expansion of  
239 the GFP<sup>+</sup> cell population beyond the RFP<sup>+</sup> area (Fig 4C-E). The lack of RFP in these cells suggests  
240 that they have lost their original fate as detected by R76A10-GAL4>RFP expression. Such  
241 GFP<sup>+</sup>RFP<sup>-</sup> cells are observed to be part of the ectopic disc, although the extent of their  
242 contributions to the ectopic disc and their location within the ectopic disc was variable from  
243 disc to discs (arrows in Fig 4C and D). Regardless, cells that originated from the notum appear

244 to contribute to the ectopic disc in these experiments, corroborating the finding with the  
245 R73G07-GAL4 driver that ectopic discs are composed of cells that originated from the notum,  
246 the hinge (outside the 30A domain), and the pleura (modeled in Fig 4F).

247

248 In our previous studies, cells of the pouch, marked with *rn-GAL4>G-trace*, did not change fate  
249 or translocate after irradiation ([13]; reproduced in Fig 5A-H). Even in experiments when we  
250 directed cell death to the hinge and left the pouch cells alive, the hinge was repaired with the  
251 hinge cells and not the pouch cells [13]. We confirmed these findings using two additional  
252 pouch GAL4 drivers, R42A07-GAL4 (from the *dve* locus) and R85E08-GAL4 (from the *salm* locus).  
253 We saw little movement of pouch cells in these experiments (Fig 5I-P). Taken together, we  
254 conclude that among the cells of the wing disc, cells in the hinge, the pleura and the notum  
255 exhibit cell fate change and translocation after irradiation (Fig 4F). Of these, hinge cells in the  
256 30A-GAL4 domain translocate and change fate in nearly all irradiated discs to regenerate the  
257 pouch [13]. In contrast, hinge cells outside the 30A domain, pleura and notum cells produce an  
258 ectopic disc in a fraction of irradiated discs.

259

260 *Compartment boundaries remain intact during regeneration but only in the primary disc*

261 *Drosophila* wing disc is sub-divided into compartments, Anterior/Posterior and Dorsal/Ventral,  
262 for example, with cell lineages restricted to each compartment during development. A recent  
263 study showed that upon massive damage to the wing discs, caused by directed expression of a  
264 pro-apoptotic gene in a specific compartment, compartment boundaries collapse and are  
265 rebuilt during regeneration [24]. Further, some cells of one compartment assumed the identity

266 of another, adjacent compartment during this process, overcoming lineage restrictions seen  
267 during development. In these models, one compartment suffered massive damage while the  
268 other compartment remained untouched. In contrast, exposure to IR causes damage that is  
269 scattered throughout the disc. To ask if compartment boundaries are breached during  
270 regeneration after IR damage, we used the same compartment-specific GAL4 drivers as in the  
271 published study, *ci-*, *en-*, and *ap-GAL4*, to express G-trace in the anterior, posterior and dorsal  
272 compartments of the wing disc, respectively. We used the protocol in Fig 1M to assay for  
273 breach of compartment boundaries during regeneration from X-ray damage. Without IR, *ci-* or  
274 *en-GAL4*>G-trace expressing discs show overlap of GFP/RFP (Fig 6A-D, I-J). In some *ap-GAL4*>G-  
275 trace discs, we observed small populations of cells that breach the boundary without IR (arrow  
276 in Fig 6R). More important, irradiated discs did not appear different from –IR control using all  
277 three compartment-specific drivers (Fig 6). This observation applies to the primary disc. In  
278 contrast, we observed fluid compartment boundaries in the ectopic disc, which may generate  
279 compartment boundaries de novo. For example, *en-GAL4*>*RFP*<sup>+</sup> and *RFP*<sup>-</sup> cells co-mingle (Fig  
280 6M-P). Furthermore, the presence of *RFP*<sup>-</sup>*GFP*<sup>+</sup> cells (arrow in Fig 6P) suggests that cells that  
281 used to have the posterior identity have lost it. We conclude that pre-existing compartment  
282 boundaries remained intact during regeneration from IR damage but are more fluid in the  
283 ectopic disc.

284

285 *Caspase activity and/or cell death are required for IR-induced cell fate plasticity*

286 Regenerative cells proliferate, change fate and change location, in order to rebuild damaged  
287 tissue. We report two aspects of regenerative behavior, cell fate change and translocation.

288 These behaviors are not seen without IR (for example, Fig 1A and Fig 4A). Therefore, we next  
289 addressed which of the consequences of IR exposure is responsible for the induction of these  
290 aspects of regenerative behavior. IR has many effects on cells including DNA double strand  
291 breaks, cell cycle arrest by checkpoints, and apoptosis. Of these, apoptosis has been  
292 demonstrated to induce one aspect of regenerative behavior, namely proliferation of the  
293 surviving cells in a phenomenon known as Apoptosis-induced-Proliferation or AiP (reviewed in  
294 [25]). Therefore, we investigated whether apoptosis is also responsible for the induction of cell  
295 fate change and translocation after IR. We used the model of hinge cells changing fate and  
296 translocating towards the pouch because this response is seen in nearly all irradiated discs, as  
297 opposed to ectopic disc formation, which occurs in a small fraction of irradiated discs [14].

298  
299 We used a chromosome deficiency that deletes three pro-apoptotic genes, *H99/+*, that has  
300 been shown before to delay and reduce IR-induced caspase activation and apoptosis [26]. We  
301 expressed 30A-GAL4>G-trace in this background, and saw reduced extent of fate change and  
302 translocation by the hinge cells (Fig 7, compare E to D, quantified in Fig 7I). We conclude that  
303 caspase activity and/or cell death is required for IR-induced regenerative behavior of the hinge  
304 cells.

305

### 306 *Effector caspase activity is required in the regenerative cells*

307 In many models of regeneration in larval wing discs, dying cells are the source of signals that  
308 promote regenerative behavior in surviving cells. Some of these signals are produced in  
309 response to apical caspase activity in the dying cells [25]. But no study we are aware of has

310 addressed the need for caspase activity in the regenerative cells. Yet, there is mounting  
311 evidence for the role of caspases in cell fate changes during development [27, 28]. Our  
312 identification of regenerative cells in the hinge and the ability to target UAS-transgenes to these  
313 using 30A-GAL4 allow us to directly address this possibility. To this end, we co-expressed p35,  
314 an inhibitor of effector caspases, with 30A-GAL4. We found that this treatment inhibited the  
315 translocation and fate change of the hinge cells. We conclude that caspase activity/apoptosis is  
316 needed in the hinge for regenerative behavior. We note that the hinge cells are protected from  
317 IR-induced caspase activation and apoptosis by the action of Wg and STAT [13]. The effect of a  
318 caspase inhibitor p35 on these cells suggest that caspases may be playing a non-apoptotic role  
319 in these cells (further discussed in DISCUSSION). JNK kinases are stress-responsive; in  
320 *Drosophila* wing discs, JNK acts in the dying cells to produce mitogenic signals, which then  
321 stimulate neighboring surviving cells to proliferate [25]. To address the role of JNK in  
322 *regenerative* cells, we co-expressed a previously characterized dominant negative JNK using a  
323 UAS transgene [29]. We find that JNK<sup>DN</sup> reduced the translocation and fate change of the hinge  
324 cells, but its effect was not as severe as inhibition effector caspases (Fig 7D-H, quantified in Fig  
325 7I).

326

327



328 **DISCUSSION**

329 In tumor biology, the concept of cancer stem cells has been controversial, but there is  
330 agreement that within a tumor, some cancer cells are better than others at re-initiating tumor  
331 growth [15, 16]. Such 'Cancer Stem-like Cells' (CSCs) are recognized by specific protein markers  
332 and by their greater ability, relative to cells without such markers, to form tumor spheres in  
333 culture or new tumors in mice. Eradication of CSCs is considered necessary for successful  
334 therapy. However, not only do CSCs generate non-stem cancer cells, non-stem cancer cells also  
335 are capable of converting to CSCs. Even more concerning, cancer treatments including IR  
336 converts non-stem cancer cells from a variety of cancer types into cells with CSC markers that  
337 can initiate new tumors in culture and in vivo [19-21]. An estimated 50% of cancer patients  
338 receive IR, alone or as part of their treatment ([www.cancer.org](http://www.cancer.org)). Yet, we know very little about  
339 what aspects of IR exposure induce CSCs. The finding that IR induces non-stem cells of the  
340 *Drosophila* larval wing discs to exhibit stem cell like properties allows us to fill in the gaps in this  
341 knowledge.

342

343 One key gap concerns the question 'what are the consequences of IR that induce stem cell-like  
344 behavior?' The answer, we report here, is caspase activity. Surprisingly, we detect this  
345 requirement in regenerative cells that translocate and change fate. Regeneration typically relies  
346 on surviving cells proliferating and re-programming to replace cells lost to cell death or surgical  
347 removal. Prior work on *Drosophila* wing discs found that cell death itself induces proliferation of  
348 the surviving cells (AiP). In this response, signaling through apical caspase Dronc and JNK in  
349 dying cells act through Dpp and Wg to promote cell division in the surviving cells [25]. This and

350 other similar mechanisms that operate in other larval discs explain the proliferative aspect of  
351 regeneration, but the re-programming aspect remained to be better understood. Our study fills  
352 the gap in the knowledge by identifying the role of effector caspases. We note two key  
353 differences between AiP and fate change/translocation. The former requires apical caspases  
354 but not effector caspases [25], while the latter requires effector caspases (this report). Further,  
355 the requirement for effector caspases is within the regenerative cells.

356

357 There are several insightful reports of regeneration after genetic ablation where cell death is  
358 directed to a specific wing compartment (for example, [30-33]). Comparison of results from  
359 these studies with ours identify similarities as well as differences. Regeneration of the pouch by  
360 the hinge after IR damage we study resembles the model in which *rn-GAL4* drove the  
361 expression of pro-apoptotic *Hid* to kill the pouch cells [30]. Lineage tracing in this model  
362 showed that the pouch was repaired, at least in part, by relocating hinge cells. The loss of hinge  
363 fate was not monitored in this study. Compartment boundaries provide another example of  
364 similarities/differences between different models. Compartment boundaries were breached  
365 during regeneration after genetic ablation of some wing disc compartments (A/P; [24]) but not  
366 others (pouch; [32]). In the latter case, mutations in *Taranis*, which is required to reestablish  
367 engrailed expression in the regenerated posterior cells, did cause the breach of compartment  
368 boundaries. We find intact compartment boundaries in regenerated primary disc after IR, but  
369 fluid boundaries in the ectopic disc. This contrasts with a report that ectopic discs that form  
370 after genetic ablation of the pouch shows intact compartment boundaries that are continuous  
371 with the pre-existing ones [33]. We note that even in genetic ablation models, the choice of

372 apoptotic gene used to kill cells can have different outcome on the regenerative behavior of the  
373 surviving cells. For example, ablation of the pouch using Eiger produced ectopic discs but  
374 ablation of the pouch using Rpr did not [33]. Collectively, these data illustrate how different  
375 regenerative models rely on different cellular behaviors, hence the need to study each to learn  
376 the range of possibilities. This, we believe, is particularly true in the case of IR where damage  
377 (i.e. cell death) is not confined to any particular compartment but scattered throughout the  
378 wing disc in a reproducible pattern [13].

379  
380 We report the identification of two additional pools of cells that exhibit IR-induced fate change  
381 and translocation, bringing the total to three (Fig 4F). A recent study used genetic ablation to  
382 probe the regenerative potential of the notum. After ablation of the pouch and the hinge, the  
383 notum showed no increase in proliferation, did not regenerate the hinge or the pouch, and  
384 instead duplicated itself. The authors concluded that the notum cells have little regenerative  
385 potential [31]. This is in sharp contrast to IR-induced regenerative behavior we see in the  
386 notum. After IR, we detect a 3-fold increase in mitotic activity in the notum [14], and lineage  
387 tracing shows the notum contributes to the ectopic discs (this report). Our results parallel more  
388 closely what happens after genetic ablation of the pouch in a recent study, which resulted in  
389 the production of ectopic wing discs in some mutant backgrounds [33]. Lineage tracing  
390 suggested that notum cells changed fate to contribute to the ectopic disc, which is perfectly in  
391 agreement with our results. We add to this picture by identifying additional pools of cells in the  
392 dorsal-posterior hinge/pleura that contribute to the ectopic discs.

393

394 We identified a requirement for effector caspase activity in the hinge cells that change fate and  
395 translocate towards the pouch. Apical caspases such as Dronc in *Drosophila*, are known to  
396 provide non-apoptotic functions, for example in initiating pro-proliferative signals to  
397 neighboring survivors in AiP [34-37]. These functions occur in addition to Dronc's role in  
398 activating effector caspases and apoptosis. What we describe here suggests a non-apoptotic  
399 role of *effector* caspases, in cell fate changes. There is precedent for non-apoptotic roles of  
400 effector caspases ([36, 38-40]; reviewed in [27]). In a particularly relevant study, effector  
401 caspase CED-3 in *C. elegans* was found to cleave three cell fate determinants encoded by *lin-*  
402 *28*, *disl-2*, and/or *lin-14*, all of which are unrelated to apoptosis, in order to ensure that cell fate  
403 changes and developmental transitions occur normally [28]. IR induces caspase activation and  
404 apoptosis by inducing IAP antagonists Hid and Rpr. After irradiation, *hid* and *rpr* are  
405 transcriptionally induced throughout the wing disc except in the hinge [13]. In the hinge, we  
406 found previously that *hid* transcription is induced but *rpr* is repressed in a Wg-dependent  
407 manner [13]. We further demonstrated that *rpr* repression can explain the observed resistance  
408 to IR-induced apoptosis in the hinge. Based on the current findings, we suggest that IR activates  
409 caspases in hinge cells but insufficiently for apoptosis. Instead, non-lethal levels of effector  
410 caspase activity, we propose, result for IR and act to facilitate two aspects of regenerative  
411 behavior in these cells, fate change and translocation towards the pouch. If true, partial effect  
412 of JNK<sup>DN</sup> we see be explained by a recently documented role of JNK [41]. This study found that  
413 in a *Drosophila* model of oncogenic RAS-driven tumors, JNK participates in a positive feed-back  
414 loop to amplify caspase activity. Caspases in this context is non-apoptotic but instead promote  
415 tumor growth and invasion. We speculate that JNK may also help amplify or sustain non-

416 apoptotic caspase activity in the hinge cells of the 30A domain, which can explain why  
417 regenerative inhibition of JNK curbs their regenerative behavior.  
418  
419 Finally, cells of the pouch displays little indication that they change fate or translocate (Fig 5)  
420 and not even when we directed cell death to the hinge and left the pouch cells alive [13]. This  
421 parallels how IR induces Cancer Stem Cell-like properties in some cancer cells but not others, a  
422 phenomenon for which we lack a mechanistic understanding. Identification of distinct pools of  
423 cells with different abilities to respond to IR in *Drosophila* will allow the identification of  
424 underlying mechanisms in the future.

425

## 426 MATERIALS AND METHODS

### 427 *Drosophila* stocks and methods

428 These stocks are described in Flybase:  $w^{1118}$ , 30A-GAL4 (on Ch II, Bloomington stock# or  
429 BL37534), Ptub-GAL80<sup>ts</sup> (on Ch III), *rn-GAL4* (on Ch III), *en-GAL4* (on Ch II), *ci-GAL4* (on Ch III),  
430 *ap-GAL4* (on Ch II), UAS-p35 (on Ch III), and UAS-JNK<sup>DN</sup> (on Ch I, BL6409). The stock used for  
431 lineage tracing is also described in Flybase;  $w^*$ ; P{UAS-RedStinger}4, P{UAS-FLP.D}JD1, P{Ubi-  
432 p63E(FRT.STOP)Stinger}9F6 /CyO (BL28280). Genotypes for some BL stocks are in S1 Table and  
433 include FlyLight stocks [16]. For all experiments except Fig 7, G-trace/CyO-GFP; GAL80<sup>ts</sup>/GAL80<sup>ts</sup>  
434 virgin females were crossed to males with various GAL4 drivers. For Fig 7, 30A-GAL4>UAS-RFP,  
435 G-trace/CyO-GFP; GAL80<sup>ts</sup>/GAL80<sup>ts</sup> virgin females were crossed to  $w^{1118}$  males ( $w^{1118}$  controls)  
436 or H99/TM6-TB males or UAS-p35/UAS-p35 males. For JNK<sup>DN</sup> experiments, UAS-JNK<sup>DN</sup>

437 homozygous virgin females were crossed to 30A-GAL4>UAS-RFP, G-trace/CyO-GFP males.

438 Progeny bearing G-trace (RFP<sup>+</sup>GFP<sup>+</sup> larvae) were sorted for use.

439

#### 440 *Larvae culture and irradiation*

441 Larvae were raised on Nutri-Fly Bloomington Formula food (Genesee Scientific) according to the

442 protocol shown in Fig 1M. The cultures were monitored daily for signs of crowding, typically

443 seen as 'dimples' in the food surface as larvae try to increase the surface area for access to air.

444 Cultures were split at the first sign of crowding. Larvae in food were placed in petri dishes and

445 irradiated in a Faxitron Cabinet X-ray System Model RX-650 (Lincolnshire, IL) at 115 kv and 5.33

446 rad/sec.

447

#### 448 *Antibody staining*

449 Antibodies to Zfh2 (1:400, rat polyclonal, [42]) and anti-rat secondary antibodies (1:200,

450 Jackson) were used. In all experiments, wing discs were dissected in PBS, fixed in 4% para-

451 formaldehyde in PBS for 30 min, and washed three times PBTx (0.1% Triton X-100). For

452 antibody staining, the discs were washed in PBS instead of PBTx after the fixing step,

453 permeabilized in PBTx with 0.5% Triton X-100 for 10 min and rinsed in PBTx. The discs were

454 blocked in 5% Normal Goat Serum in PBTx for at least 30 min and incubated overnight at 4°C in

455 primary antibody in block. The discs were rinsed thrice in PBTx and incubated in secondary

456 antibody in block for 2 h at room temperature. Stained discs were washed in PBT. The discs

457 were counter-stained with 10 µg/ml Hoechst33258 in PBTx for 2 min, washed 3 times, and

458 mounted on glass slides in Fluoromount G (SouthernBiotech).

459 *Image Analysis*

460 With the exceptions noted below, the discs were imaged on a Perkin Elmers spinning disc  
461 confocal attached to a Nikon inverted microscope, using a SDC Andor iXon Ultra (DU-897) EM  
462 CCD camera. The NIS- Elements acquisition software's large image stitching tool was used for  
463 the image capture. 15 z-sections 1  $\mu$ m apart were collected per disc. Sections that exclude the  
464 peripodial cells were collapsed using 'maximum projection' in Image J. The exceptions are  
465 images in S1 Fig which were acquired on a Leica DMR compound microscope using a Q-Imaging  
466 R6 CCD camera and Ocular software.

467

468 *Statistical Analysis*

469 For sample size justifications, we used a simplified resource equation from [43];  $E = \text{Total}$   
470  $\text{number of animals} - \text{Total number of groups}$ , where E value of 10-20 is considered adequate.  
471 When we compare two groups ( $w^{1118}$  vs H99/+, for example), 6 per group or  $E = 11$  would be  
472 adequate. All samples subjected to statistical analysis exceed this criterion. Two tailed student  
473 t-tests were used in Fig 7.

474

475 **ACKNOWLEDGMENTS**

476 *Drosophila* stocks from the Bloomington *Drosophila* Stock Center (NIH P40OD018537) were  
477 used in this study. We are grateful to the FlyLight team for generating and distributing these  
478 stocks, without which this study would not be possible. We thank Chris Doe for anti-Zfh2  
479 antibodies. We thank the Light Confocal Microscopy Facility of MCD Biology, CU Boulder, for  
480 assistance with imaging.

481 **REFERENCES**

- 482 1. Fuchs E. Skin stem cells: rising to the surface. *J Cell Biol.* 2008;180(2):273-84. doi:  
483 10.1083/jcb.200708185. PubMed PMID: 18209104; PubMed Central PMCID: PMCPMC2213592.
- 484 2. Gervais L, Bardin AJ. Tissue homeostasis and aging: new insight from the fly intestine.  
485 *Curr Opin Cell Biol.* 2017;48:97-105. doi: 10.1016/j.ceb.2017.06.005. PubMed PMID: 28719867.
- 486 3. Grompe M. Tissue stem cells: new tools and functional diversity. *Cell Stem Cell.*  
487 2012;10(6):685-9. doi: 10.1016/j.stem.2012.04.006. PubMed PMID: 22704508; PubMed Central  
488 PMCID: PMCPMC3940056.
- 489 4. Grompe M. Liver stem cells, where art thou? *Cell Stem Cell.* 2014;15(3):257-8. doi:  
490 10.1016/j.stem.2014.08.004. PubMed PMID: 25192457.
- 491 5. Michalopoulos GK. Liver regeneration. *J Cell Physiol.* 2007;213(2):286-300. doi:  
492 10.1002/jcp.21172. PubMed PMID: 17559071; PubMed Central PMCID: PMCPMC2701258.
- 493 6. Michalopoulos GK, Khan Z. Liver Stem Cells: Experimental Findings and Implications for  
494 Human Liver Disease. *Gastroenterology.* 2015;149(4):876-82. doi:  
495 10.1053/j.gastro.2015.08.004. PubMed PMID: 26278502; PubMed Central PMCID:  
496 PMCPMC4584191.
- 497 7. Chaffer CL, Brueckmann I, Scheel C, Kaestli AJ, Wiggins PA, Rodrigues LO, et al. Normal  
498 and neoplastic nonstem cells can spontaneously convert to a stem-like state. *Proc Natl Acad Sci*  
499 *U S A.* 2011;108(19):7950-5. doi: 10.1073/pnas.1102454108. PubMed PMID: 21498687;  
500 PubMed Central PMCID: PMCPMC3093533.
- 501 8. Chang-Panesso M, Humphreys BD. Cellular plasticity in kidney injury and repair. *Nat Rev*  
502 *Nephrol.* 2017;13(1):39-46. doi: 10.1038/nrneph.2016.169. PubMed PMID: 27890924.



- 503 9. Tata PR, Rajagopal J. Plasticity in the lung: making and breaking cell identity.  
504 Development. 2017;144(5):755-66. doi: 10.1242/dev.143784. PubMed PMID: 28246210;  
505 PubMed Central PMCID: PMC5374348.
- 506 10. Pfefferli C, Jazwinska A. The art of fin regeneration in zebrafish. Regeneration (Oxf).  
507 2015;2(2):72-83. doi: 10.1002/reg2.33. PubMed PMID: 27499869; PubMed Central PMCID:  
508 PMC4895310.
- 509 11. Jaklevic BR, Su TT. Relative contribution of DNA repair, cell cycle checkpoints, and cell  
510 death to survival after DNA damage in *Drosophila* larvae. Curr Biol. 2004;14(1):23-32. PubMed  
511 PMID: 14711410.
- 512 12. James AA, Bryant PJ. A quantitative study of cell death and mitotic inhibition in gamma-  
513 irradiated imaginal wing discs of *Drosophila melanogaster*. Radiat Res. 1981;87(3):552-64. Epub  
514 1981/09/01. PubMed PMID: 6792652.
- 515 13. Verghese S, Su TT. *Drosophila* Wnt and STAT Define Apoptosis-Resistant Epithelial Cells  
516 for Tissue Regeneration after Irradiation. PLoS Biol. 2016;14(9):e1002536. doi:  
517 10.1371/journal.pbio.1002536. PubMed PMID: 27584613; PubMed Central PMCID:  
518 PMC5008734.
- 519 14. Verghese S, Su TT. STAT, Wingless, and Nurf-38 determine the accuracy of regeneration  
520 after radiation damage in *Drosophila*. PLoS Genet. 2017;13(10):e1007055. doi:  
521 10.1371/journal.pgen.1007055. PubMed PMID: 29028797; PubMed Central PMCID:  
522 PMC5656321.
- 523 15. Schubiger G. Regeneration, duplication and transdetermination in fragments of the leg  
524 disc of *Drosophila melanogaster*. Dev Biol. 1971;26(2):277-95. PubMed PMID: 5003476.

- 525 16. Pfeiffer BD, Ngo TT, Hibbard KL, Murphy C, Jenett A, Truman JW, et al. Refinement of  
526 tools for targeted gene expression in *Drosophila*. *Genetics*. 2010;186(2):735-55. doi:  
527 10.1534/genetics.110.119917. PubMed PMID: 20697123; PubMed Central PMCID:  
528 PMCPMC2942869.
- 529 17. Lagadec C, Vlashi E, Della Donna L, Dekmezian C, Pajonk F. Radiation-induced  
530 reprogramming of breast cancer cells. *Stem Cells*. 2012;30(5):833-44. doi: 10.1002/stem.1058.  
531 PubMed PMID: 22489015; PubMed Central PMCID: PMCPMC3413333.
- 532 18. Lee SY, Jeong EK, Ju MK, Jeon HM, Kim MY, Kim CH, et al. Induction of metastasis, cancer  
533 stem cell phenotype, and oncogenic metabolism in cancer cells by ionizing radiation. *Mol*  
534 *Cancer*. 2017;16(1):10. doi: 10.1186/s12943-016-0577-4. PubMed PMID: 28137309; PubMed  
535 Central PMCID: PMCPMC5282724.
- 536 19. Pisco AO, Huang S. Non-genetic cancer cell plasticity and therapy-induced stemness in  
537 tumour relapse: 'What does not kill me strengthens me'. *Br J Cancer*. 2015;112(11):1725-32.  
538 doi: 10.1038/bjc.2015.146. PubMed PMID: 25965164; PubMed Central PMCID:  
539 PMCPMC4647245.
- 540 20. Vlashi E, Chen AM, Boyrie S, Yu G, Nguyen A, Brower PA, et al. Radiation-Induced  
541 Dedifferentiation of Head and Neck Cancer Cells Into Cancer Stem Cells Depends on Human  
542 Papillomavirus Status. *Int J Radiat Oncol Biol Phys*. 2016;94(5):1198-206. doi:  
543 10.1016/j.ijrobp.2016.01.005. PubMed PMID: 27026319; PubMed Central PMCID:  
544 PMCPMC4817367.

- 545 21. Evans CJ, Olson JM, Ngo KT, Kim E, Lee NE, Kuoy E, et al. G-TRACE: rapid Gal4-based cell  
546 lineage analysis in *Drosophila*. *Nat Methods*. 2009;6(8):603-5. Epub 2009/07/28. doi:  
547 10.1038/nmeth.1356. PubMed PMID: 19633663; PubMed Central PMCID: PMC2754220.
- 548 22. Terriente J, Perea D, Suzanne M, Diaz-Benjumea FJ. The *Drosophila* gene *zfh2* is required  
549 to establish proximal-distal domains in the wing disc. *Dev Biol*. 2008;320(1):102-12. doi:  
550 10.1016/j.ydbio.2008.04.028. PubMed PMID: 18571155.
- 551 23. Corish P, Tyler-Smith C. Attenuation of green fluorescent protein half-life in mammalian  
552 cells. *Protein Eng*. 1999;12(12):1035-40. PubMed PMID: 10611396.
- 553 24. Herrera SC, Morata G. Transgressions of compartment boundaries and cell  
554 reprogramming during regeneration in *Drosophila*. *Elife*. 2014;3:e01831. doi:  
555 10.7554/eLife.01831. PubMed PMID: 24755288; PubMed Central PMCID: PMC3989595.
- 556 25. Fogarty CE, Bergmann A. The Sound of Silence: Signaling by Apoptotic Cells. *Curr Top*  
557 *Dev Biol*. 2015;114:241-65. doi: 10.1016/bs.ctdb.2015.07.013. PubMed PMID: 26431570;  
558 PubMed Central PMCID: PMC3989595.
- 559 26. Wichmann A, Jaklevic B, Su TT. Ionizing radiation induces caspase-dependent but Chk2-  
560 and p53-independent cell death in *Drosophila melanogaster*. *Proc Natl Acad Sci U S A*.  
561 2006;103(26):9952-7. doi: 10.1073/pnas.0510528103. PubMed PMID: 16785441; PubMed  
562 Central PMCID: PMC1502560.
- 563 27. Nakajima YI, Kuranaga E. Caspase-dependent non-apoptotic processes in development.  
564 *Cell Death Differ*. 2017;24(8):1422-30. doi: 10.1038/cdd.2017.36. PubMed PMID: 28524858;  
565 PubMed Central PMCID: PMC5520453.

- 566 28. Weaver BP, Zabinsky R, Weaver YM, Lee ES, Xue D, Han M. CED-3 caspase acts with  
567 miRNAs to regulate non-apoptotic gene expression dynamics for robust development in *C.*  
568 *elegans*. *Elife*. 2014;3:e04265. doi: 10.7554/eLife.04265. PubMed PMID: 25432023; PubMed  
569 Central PMCID: PMC4279084.
- 570 29. Bossuyt W, De Geest N, Aerts S, Leenaerts I, Marynen P, Hassan BA. The atonal  
571 proneural transcription factor links differentiation and tumor formation in *Drosophila*. *PLoS*  
572 *Biol*. 2009;7(2):e40. doi: 10.1371/journal.pbio.1000040. PubMed PMID: 19243220; PubMed  
573 Central PMCID: PMC2652389.
- 574 30. Herrera SC, Martin R, Morata G. Tissue homeostasis in the wing disc of *Drosophila*  
575 *melanogaster*: immediate response to massive damage during development. *PLoS Genet*.  
576 2013;9(4):e1003446. Epub 2013/05/02. doi: 10.1371/journal.pgen.1003446. PubMed PMID:  
577 23633961; PubMed Central PMCID: PMC3636033.
- 578 31. Martin R, Pinal N, Morata G. Distinct regenerative potential of trunk and appendages of  
579 *Drosophila* mediated by JNK signalling. *Development*. 2017;144(21):3946-56. doi:  
580 10.1242/dev.155507. PubMed PMID: 28935711.
- 581 32. Schuster KJ, Smith-Bolton RK. Taranis Protects Regenerating Tissue from Fate Changes  
582 Induced by the Wound Response in *Drosophila*. *Dev Cell*. 2015;34(1):119-28. Epub 2015/06/23.  
583 doi: 10.1016/j.devcel.2015.04.017. PubMed PMID: 26096735.
- 584 33. Worley MI, Alexander LA, Hariharan IK. CtBP impedes JNK- and Upd/STAT-driven cell  
585 fate misspecifications in regenerating *Drosophila* imaginal discs. *Elife*. 2018;7. doi:  
586 10.7554/eLife.30391. PubMed PMID: 29372681; PubMed Central PMCID: PMC5823544.

- 587 34. Wells BS, Yoshida E, Johnston LA. Compensatory proliferation in *Drosophila* imaginal  
588 discs requires Dronc-dependent p53 activity. *Curr Biol.* 2006;16(16):1606-15. Epub 2006/08/22.  
589 doi: 10.1016/j.cub.2006.07.046. PubMed PMID: 16920621; PubMed Central PMCID:  
590 PMC1764442.
- 591 35. Kondo S, Senoo-Matsuda N, Hiromi Y, Miura M. DRONC coordinates cell death and  
592 compensatory proliferation. *Mol Cell Biol.* 2006;26(19):7258-68. doi: 10.1128/MCB.00183-06.  
593 PubMed PMID: 16980627; PubMed Central PMCID: PMC1592896.
- 594 36. Kamber Kaya HE, Ditzel M, Meier P, Bergmann A. An inhibitory mono-ubiquitylation of  
595 the *Drosophila* initiator caspase Dronc functions in both apoptotic and non-apoptotic pathways.  
596 *PLoS Genet.* 2017;13(2):e1006438. doi: 10.1371/journal.pgen.1006438. PubMed PMID:  
597 28207763; PubMed Central PMCID: PMC5313150.
- 598 37. Fan Y, Wang S, Hernandez J, Yenigun VB, Hertlein G, Fogarty CE, et al. Genetic models of  
599 apoptosis-induced proliferation decipher activation of JNK and identify a requirement of EGFR  
600 signaling for tissue regenerative responses in *Drosophila*. *PLoS Genet.* 2014;10(1):e1004131.  
601 doi: 10.1371/journal.pgen.1004131. PubMed PMID: 24497843; PubMed Central PMCID:  
602 PMC3907308.
- 603 38. Arama E, Agapite J, Steller H. Caspase activity and a specific cytochrome C are required  
604 for sperm differentiation in *Drosophila*. *Dev Cell.* 2003;4(5):687-97. PubMed PMID: 12737804.
- 605 39. Kuranaga E, Kanuka H, Tonoki A, Takemoto K, Tomioka T, Kobayashi M, et al. *Drosophila*  
606 IKK-related kinase regulates nonapoptotic function of caspases via degradation of IAPs. *Cell.*  
607 2006;126(3):583-96. doi: 10.1016/j.cell.2006.05.048. PubMed PMID: 16887178.

- 608 40. Yee C, Yang W, Hekimi S. The intrinsic apoptosis pathway mediates the pro-longevity  
609 response to mitochondrial ROS in *C. elegans*. *Cell*. 2014;157(4):897-909. doi:  
610 10.1016/j.cell.2014.02.055. PubMed PMID: 24813612; PubMed Central PMCID:  
611 PMC4454526.
- 612 41. Perez E, Lindblad JL, Bergmann A. Tumor-promoting function of apoptotic caspases by  
613 an amplification loop involving ROS, macrophages and JNK in *Drosophila*. *Elife*. 2017;6. doi:  
614 10.7554/eLife.26747. PubMed PMID: 28853394.
- 615 42. Tran KD, Miller MR, Doe CQ. Recombineering Hunchback identifies two conserved  
616 domains required to maintain neuroblast competence and specify early-born neuronal identity.  
617 *Development*. 2010;137(9):1421-30. doi: 10.1242/dev.048678. PubMed PMID: 20335359;  
618 PubMed Central PMCID: PMC2853844.
- 619 43. Charan J, Kantharia ND. How to calculate sample size in animal studies? *J Pharmacol*  
620 *Pharmacother*. 2013;4(4):303-6. doi: 10.4103/0976-500X.119726. PubMed PMID: 24250214;  
621 PubMed Central PMCID: PMC3826013.
- 622 44. Butler MJ, Jacobsen TL, Cain DM, Jarman MG, Hubank M, Whittle JR, et al. Discovery of  
623 genes with highly restricted expression patterns in the *Drosophila* wing disc using DNA  
624 oligonucleotide microarrays. *Development*. 2003;130(4):659-70. PubMed PMID: 12505997.  
625  
626

627 **FIGURE LEGENDS**

628 **Figure 1. Lineage tracing with two GAL4 drivers that are active in the hinge**

629 Wing discs were removed from 3<sup>rd</sup> instar larvae without irradiation, fixed and imaged for  
630 RFP/GFP. The discs in J-K were also stained with an antibody to Zfh2. All discs are shown with  
631 anterior (A) left and dorsal (D) up as in (N). Scale bar = 100 microns.

632 (A-C) 30A-GAL4 drives UAS-RFP (real time marker) and GFP (lineage marker)

633 (D-I) R73G07-GAL4 drives UAS-RFP (real time marker) and GFP (lineage marker).

634 Restricting GAL4 activity with GAL80<sup>ts</sup> eliminated the expression of GFP in the notum (\*) in (G-I).

635 (J-L) Zfh2 antibody staining and 30A>RFP expression. Zfh2-expressing cells outside the  
636 30A domain are indicated with arrowheads.

637 (M) The temperature shift protocol. Embryos were collected at 18°C for 24 h and  
638 cultured at 18°C until 4-5 days after egg laying, reaching late 2<sup>nd</sup> instar. Larvae were shifted to  
639 29°C for 24 h to reach early 3<sup>rd</sup> instar before irradiation with 0 or 4000 R of X-rays. Discs were  
640 dissected 48 h later (for -IR controls) or 72 h after IR (+IR samples) because IR delays  
641 development.

642 (N) The fate map with dotted lines added to indicate the pleura. Arrowhead points to  
643 the region that is Zfh2-expressing but outside the 30A domain in (J-L). Figure modified from  
644 [44].

645 The genotypes were:

646 (A-C) 30A-GAL4, UAS-G-trace (see S1 Table for G-trace genotype)/SM5

647 (D-F) UAS-G-trace/+; R73G07-GAL4/+

648 (G-I) UAS-G-trace/+; R73G07-GAL4/tub-GAL80<sup>ts</sup>

649 (J-L) 30A-GAL4, UAS-G-trace /+; tub-GAL80<sup>ts</sup>/+

650

651 **Figure 2. Posterior-dorsal hinge cells translocate towards the notum after IR**

652 Larvae of the genotype UAS-G-trace/+; GAL80<sup>ts</sup>/ R73G07-GAL4 were treated as in Fig 1M. Wing

653 discs are removed, fixed and imaged for RFP/GFP. All discs are shown with anterior (A) left and

654 dorsal (D) up. Scale bar = 33 microns in D, H, L and P and 100 microns in the rest of the panels.

655 Arrowheads = GFP<sup>+</sup> cell populations in the notum that are contiguous with the hinge. Arrows =

656 GFP<sup>+</sup> cell populations in the notum that are contiguous with the pleura. \* = cells outside the

657 columnar epithelial layer that express G-trace.

658

659 **Figure 3. R73G07-GAL4>G-trace in a time course**

660 Larvae of the genotype UAS-G-trace/+; GAL80<sup>ts</sup>/ R73G07-GAL4 were treated as in Fig 1M. Wing

661 discs are removed, fixed and imaged for RFP/GFP at 24, 48 or 72 h after IR. The discs were also

662 stained for DNA. All discs are shown with anterior (A) left and dorsal (D) up. Magnified panels

663 show the relevant portion of the disc preceding it, except for M-N that shows the ectopic disc

664 from a second 72 h disc. Scale bar = 33 microns in C, F, H, K and O, and 100 microns in the rest

665 of the panels. Arrowheads = GFP<sup>+</sup> cell populations in the notum that are contiguous with the

666 hinge. Arrow = GFP<sup>+</sup> cell populations in the notum that are contiguous with the pleura. \* = cells

667 outside the columnar epithelial layer that express G-trace.

668

669 **Figure 4. Cells of the notum contribute to ectopic discs**



670 Larvae of the genotype UAS-G-trace/+; GAL80<sup>ts</sup>/ R76A01-GAL4 were treated as in Fig 1M. Wing  
671 discs are removed, fixed and imaged for RFP/GFP. The discs were also stained for DNA. All discs  
672 are shown with anterior (A) left and dorsal (D) up. Scale bar = 100 microns. Arrows = GFP<sup>+</sup>RFP<sup>-</sup>  
673 cells that are part of the ectopic disc.

674

675 **Figure 5. Cells of the pouch do not show regenerative properties after irradiation**

676 Larvae of the genotype UAS-G-trace/+; GAL80<sup>ts</sup>/ rn-GAL4 (A-H), R42A07-GAL4 (I-L) or R85E08-  
677 GAL4 (M-P) were treated as in Fig 1M. Wing discs are removed, fixed and imaged for RFP/GFP.  
678 The discs were also stained for DNA. All discs are shown with anterior (A) left and dorsal (D) up.  
679 Scale bar = 100 microns.

680

681 **Figure 6. Cells do not cross pre-existing compartment boundaries during regeneration after IR**

682 Larvae were treated as in Fig 1M. Wing discs are removed, fixed and imaged for RFP/GFP. The  
683 discs were also stained for DNA. All discs are shown with anterior (A) left and dorsal (D) up.  
684 Total number of disc examined were 56 ci-IR, 22 ci+IR, 35 en-IR, 93 en+IR, 46 ap-IR, and 88  
685 ap+IR. Scale bar = 40 microns in N-P and 120 microns in all other panels. The genotypes were:

686 (A-H) UAS-G-trace/ci-GAL4; tub-GAL80<sup>ts</sup>/+

687 (I-P) UAS-G-trace/en-GAL4; tub-GAL80<sup>ts</sup>/+

688 (Q-T) UAS-G-trace/ap-GAL4; tub-GAL80<sup>ts</sup>/+

689

690 **Figure 7. Apoptosis/caspase activity is needed for IR-induced regenerative behavior.**

691 Larvae were treated as in Fig 1M. Wing discs are removed, fixed and imaged for RFP/GFP. All  
692 discs are shown with anterior left and dorsal up. GFP<sup>+</sup>RFP<sup>-</sup> area within the pouch region (yellow  
693 dashed lines in A) was quantified in Image J and normalized to the RFP<sup>+</sup> area of the hinge and  
694 plotted in (G). n=9 for H99/+ +IR and 10 each for all other samples, from two biological replicate  
695 experiments. Statistical significance was determined using 2-tailed student's t-test. Scale bar =  
696 100 microns. The genotypes were:

697 w<sup>1118</sup> = 30A-GAL4, UAS-G-trace; tub-GAL80<sup>ts</sup>/+, from a cross of w<sup>1118</sup> to 30A-GAL4, UAS-G-  
698 trace/CyO-GFP; tub-GAL80<sup>ts</sup>/ tub-GAL80<sup>ts</sup>

699 H99/+ = 30A-GAL4, UAS-G-trace/+; tub-GAL80<sup>ts</sup>/H99 deficiency

700 UAS-p35 = 30A-GAL4, UAS-G-trace/+; tub-GAL80<sup>ts</sup>/UAS-p35

701 UAS-JNK<sup>DN</sup> = UAS-JNK<sup>DN</sup>/+; 30A-GAL4, UAS-G-trace/+; tub-GAL80<sup>ts</sup>/+

702

### 703 **S1 Figure. Lineage tracing with Flylight GAL4 drivers**

704 Larvae were treated as in Fig 1M –IR. Wing discs are removed, fixed and imaged for RFP/GFP.

705 All discs are shown with anterior (A) left and dorsal (D) up. Scale bar = 120 microns. The  
706 genotypes were: UAS-G-trace/+; tub-GAL80<sup>ts</sup>/GAL4. Bloomington stock number (BL) and Flylight  
707 construct number (R-) and the locus of origin for the enhancer are indicated on each panel. We  
708 also tested and found no RFP/GFP expression with *BH-1* R81E08 (BL40117) and *doc-1* R45H05  
709 (BL46529), and weak RFP expression in the peripodium with *unc5* R93E10 (BL48420). R85E08  
710 (*salm*), R42A07 (*dve*) and R76A01 (*tup*) showed good overlap of RFP/GFP and were used in  
711 lineage tracing studies.

712

713 **S2 Figure. G-trace expression in cells outside the columnar epithelial layer**

714 Wing discs were removed from 3<sup>rd</sup> instar larvae expressing R73G07-GAL4>G-trace and treated  
715 as in Fig 1M-IR, fixed and imaged for GFP. The disc shown is the same as in Fig 2A-D. Three  
716 optical sections illustrate peripodial cells (A, arrows), columnar epithelial cells (B, but also  
717 visible in other optical sections) and tracheal cells (C, arrows). The disc is shown with anterior  
718 (A) left and dorsal (D) up.

719

720 **S1 Table. Genotypes and stock numbers for stocks from Bloomington Stock Center used in**  
721 **this work.**

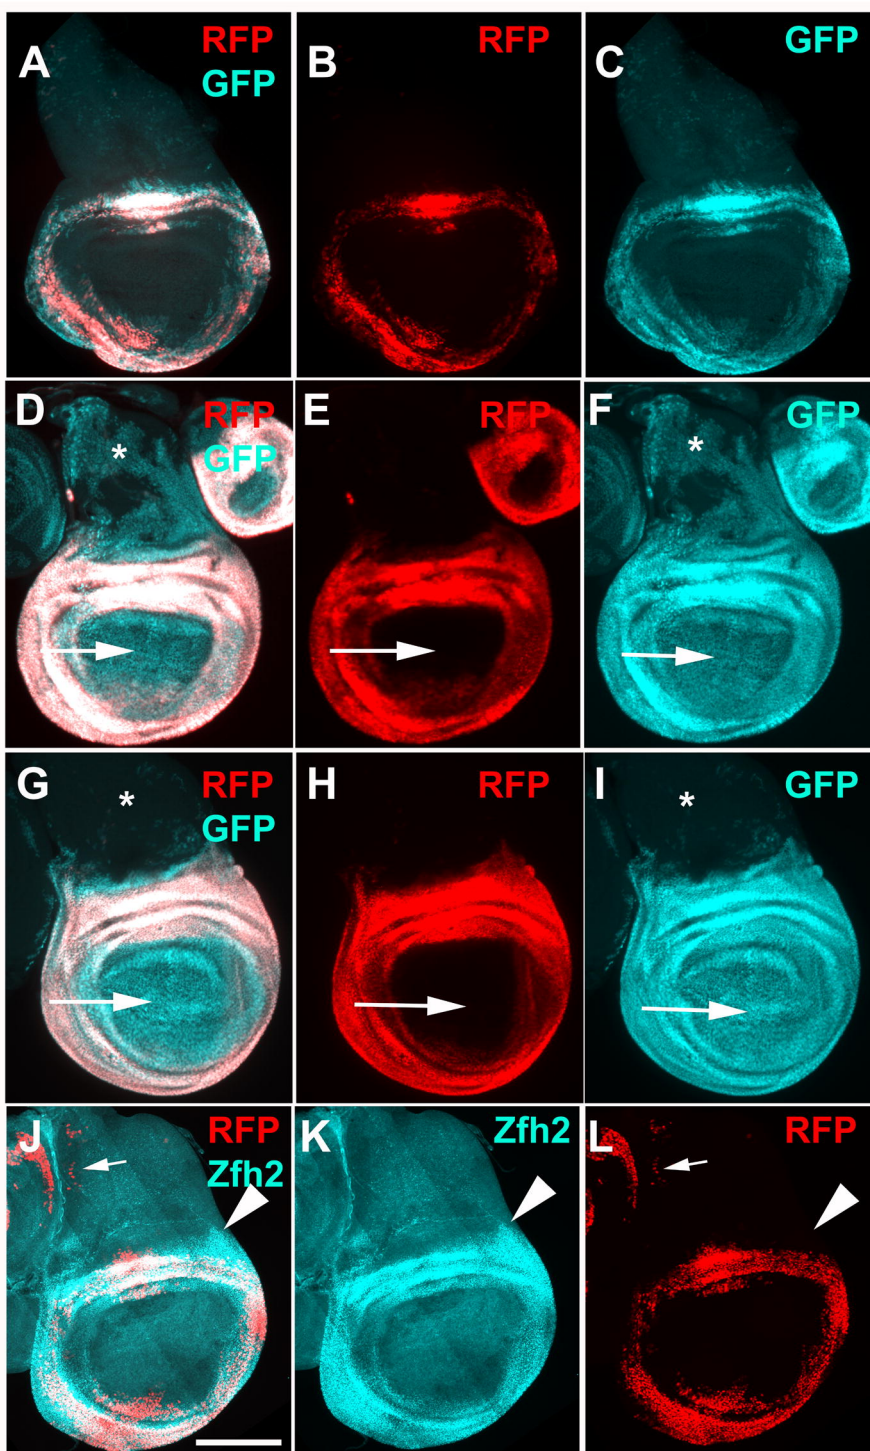

**M**

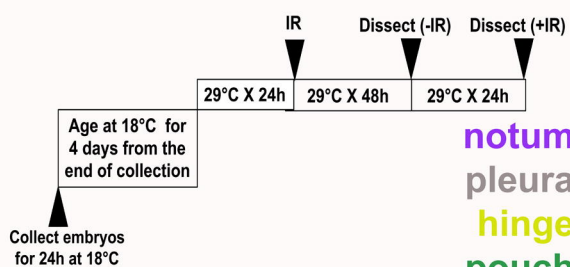

notum  
 pleura  
 hinge  
 pouch

**N**

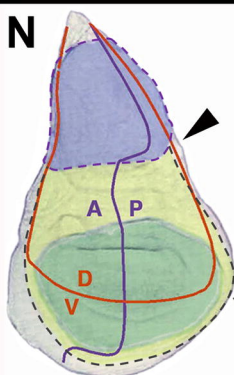

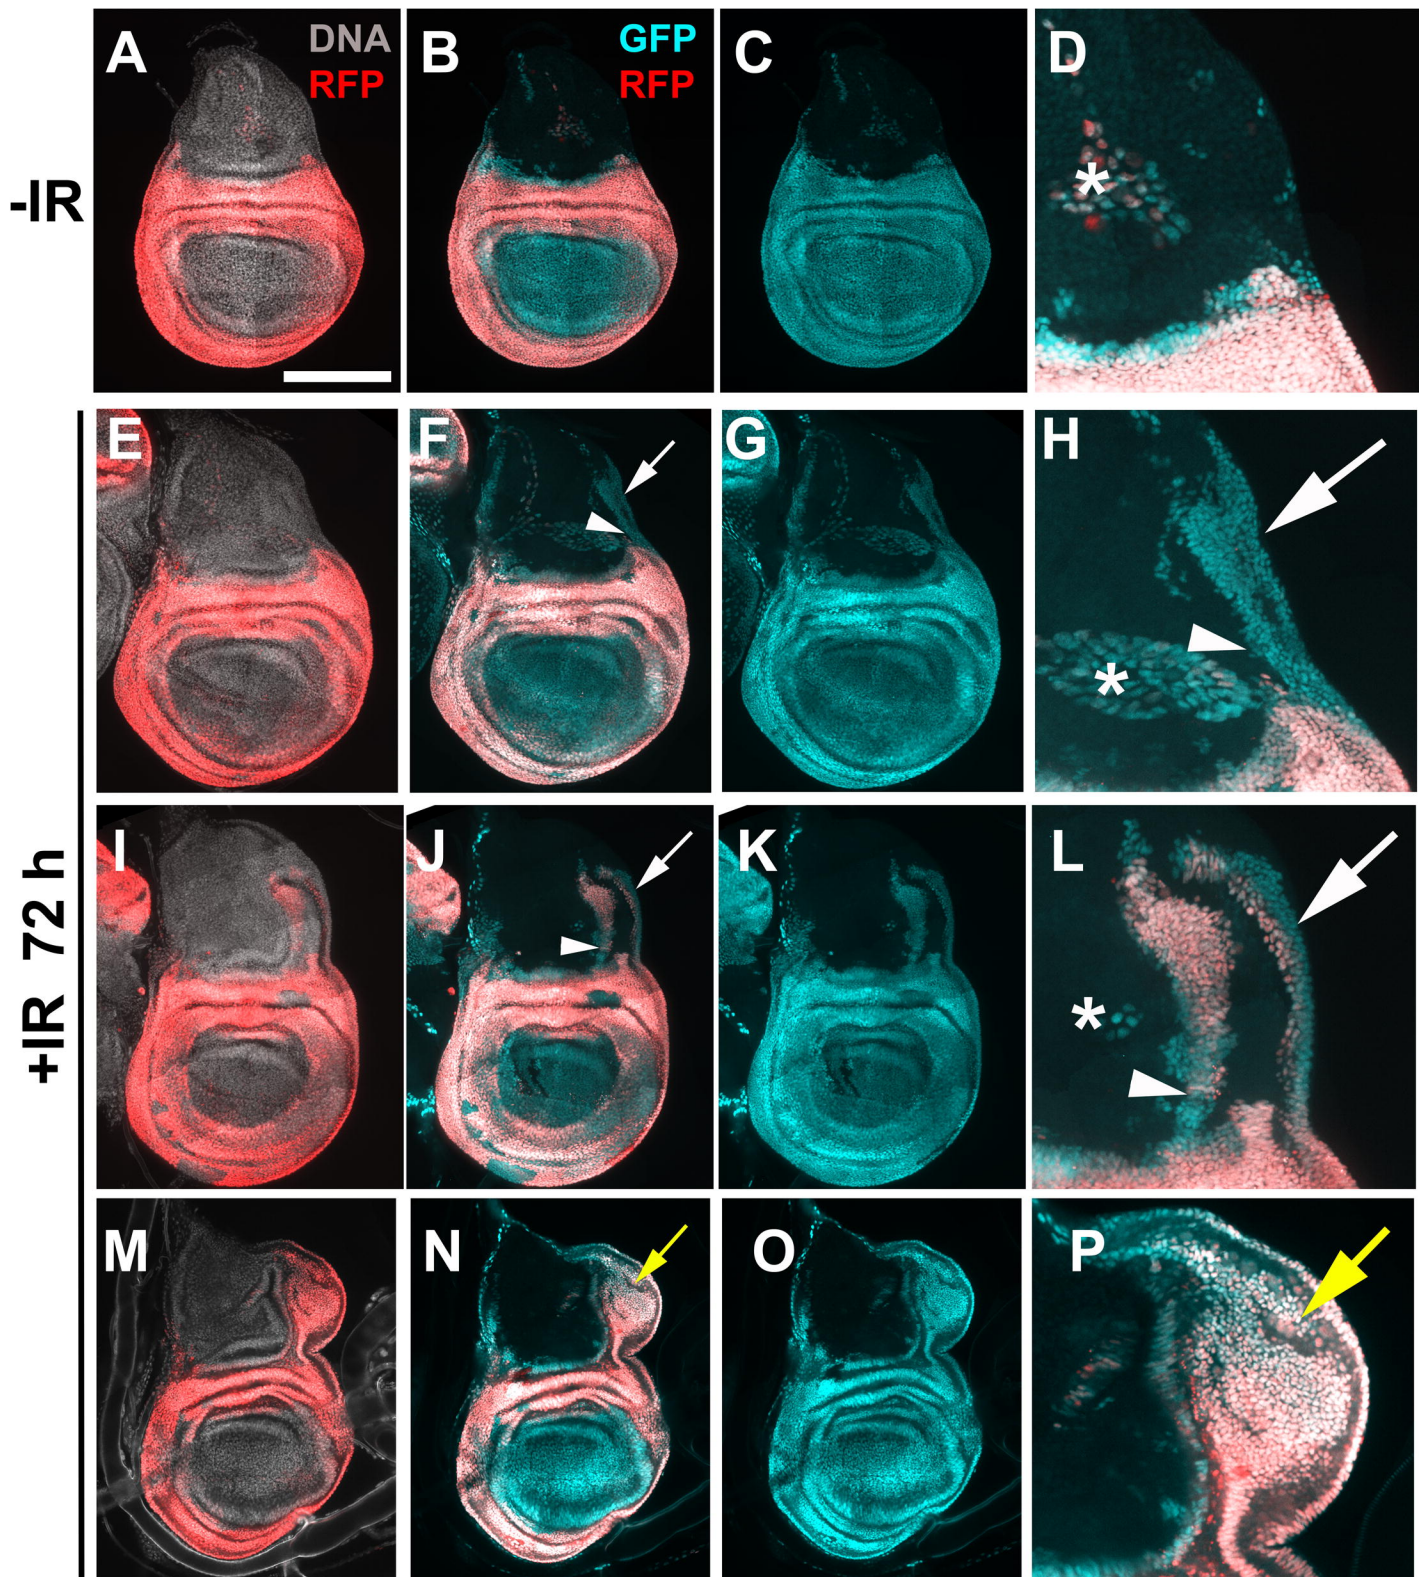

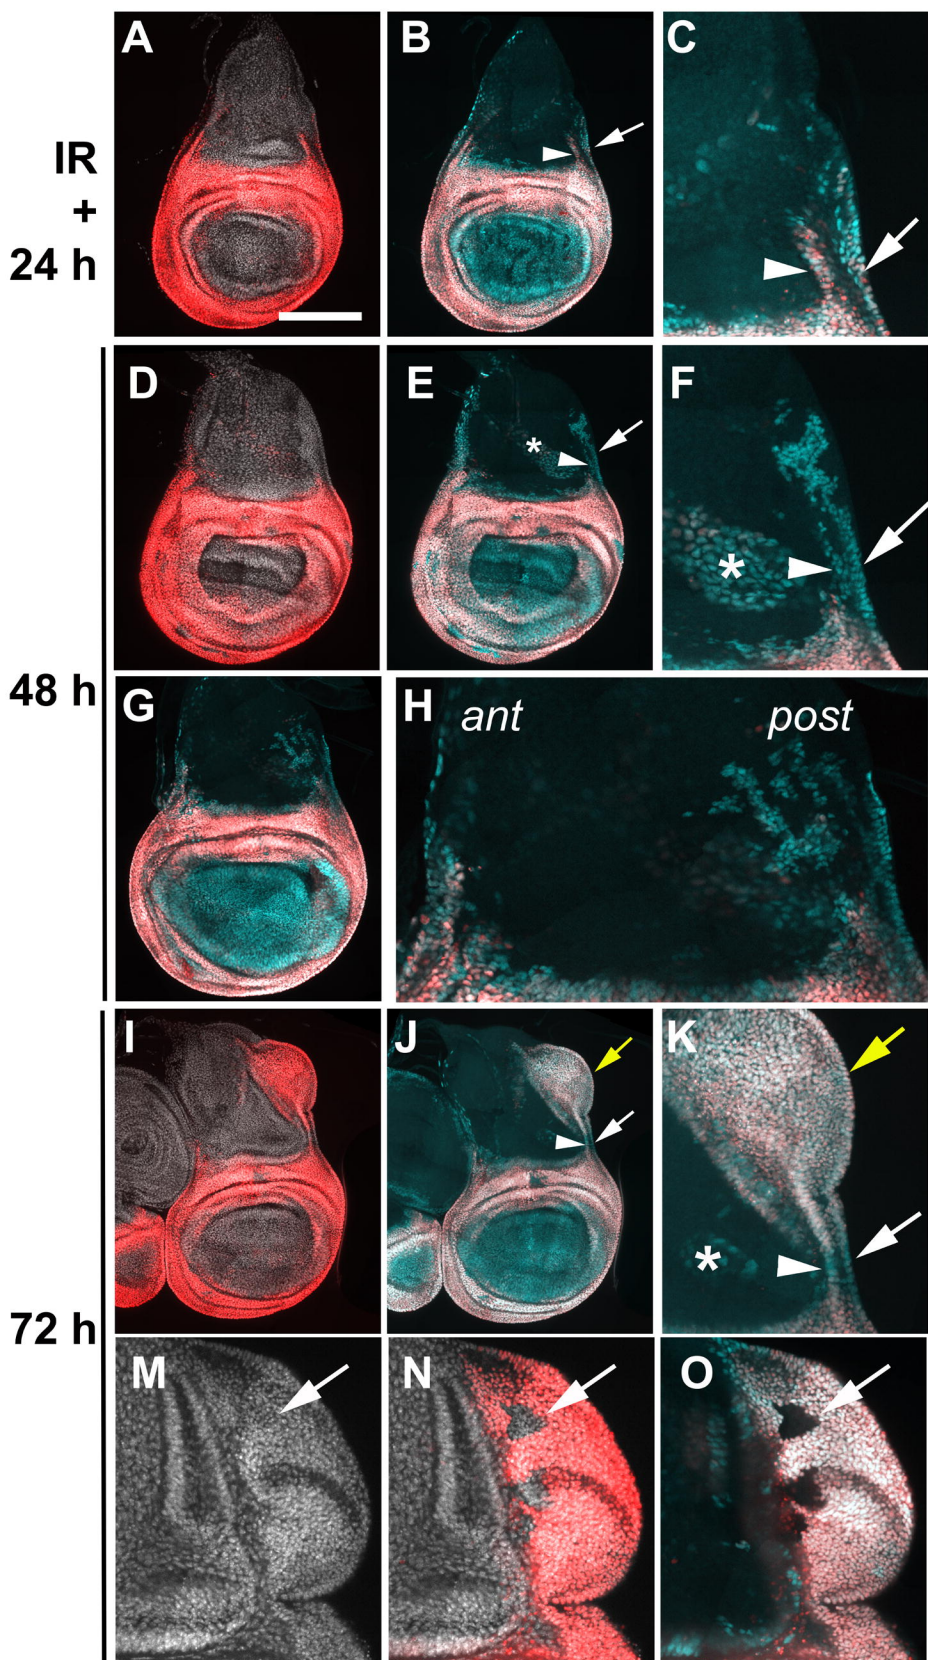

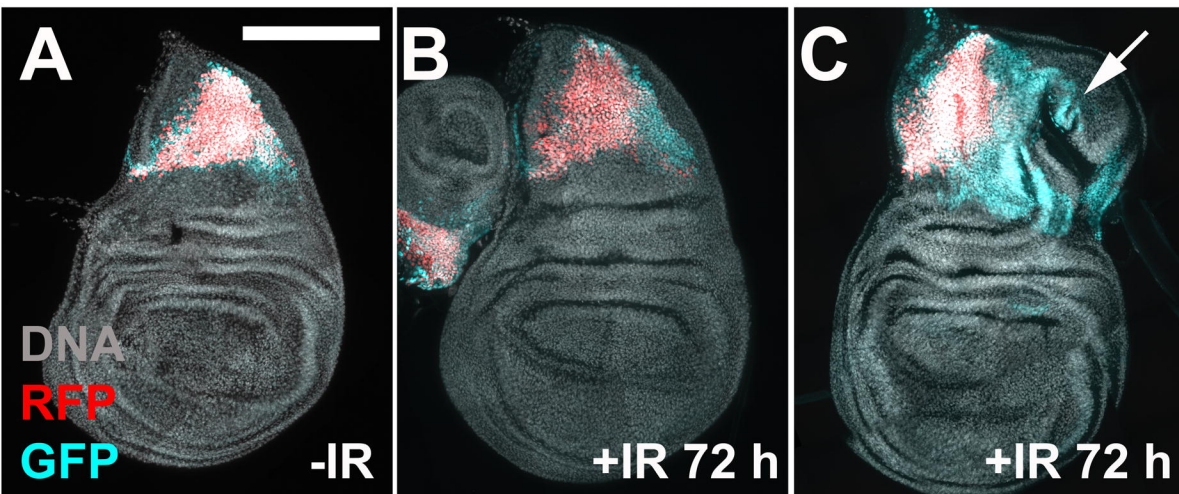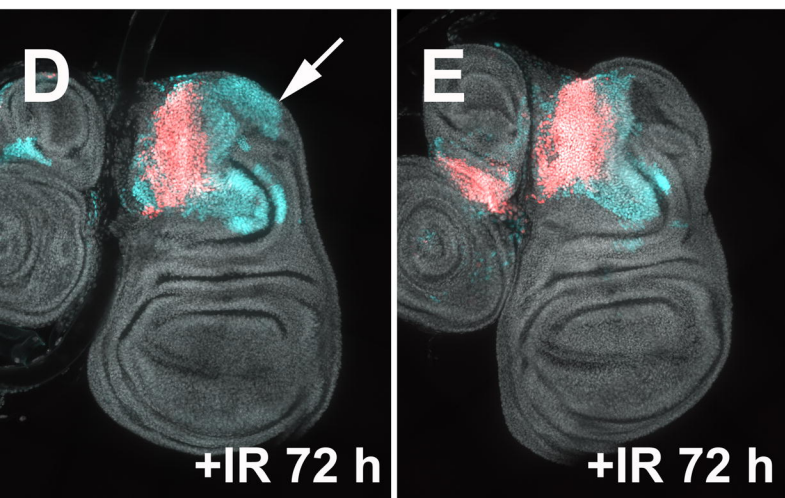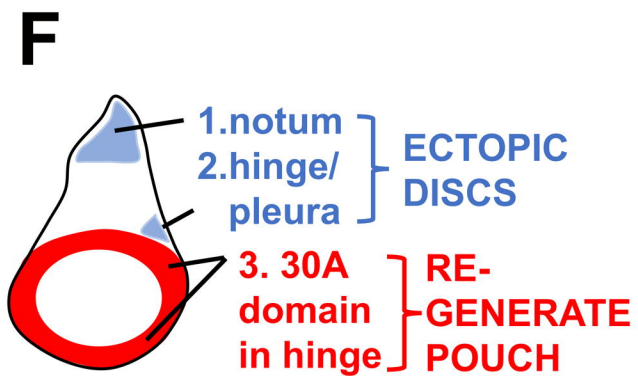

rn-GAL4 -IR

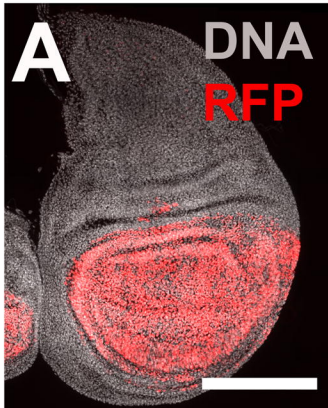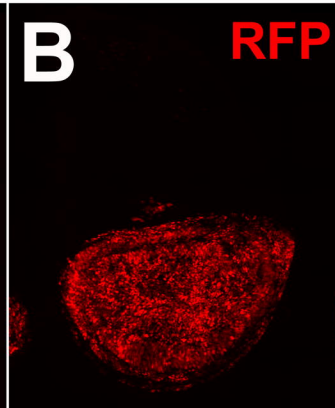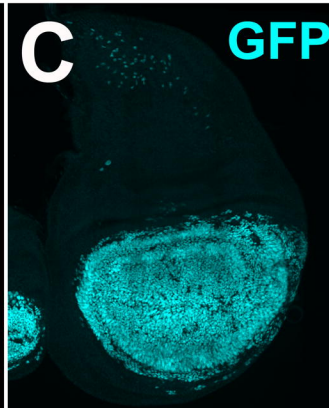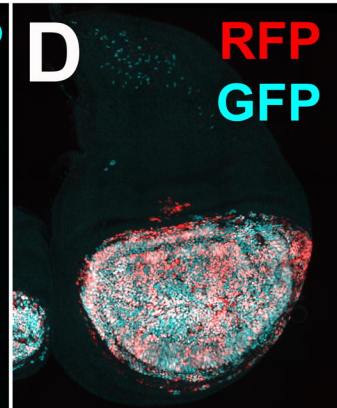

rn-GAL4 +IR

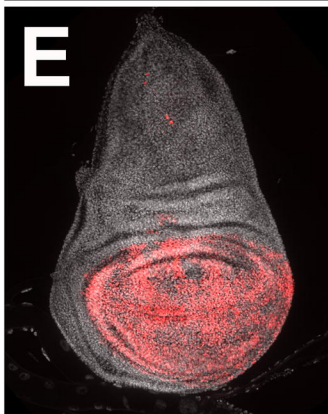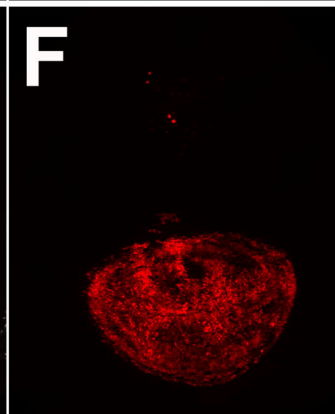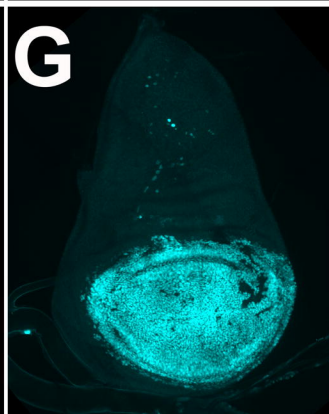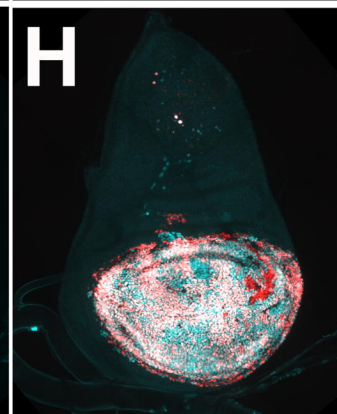

R42A07

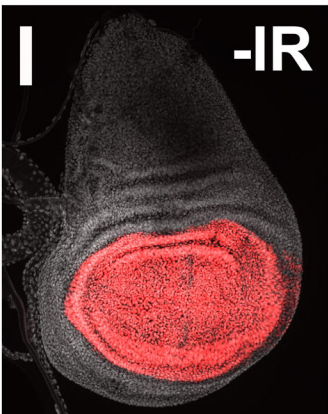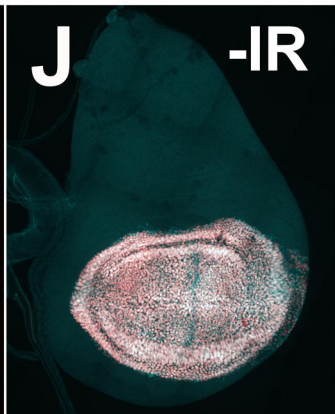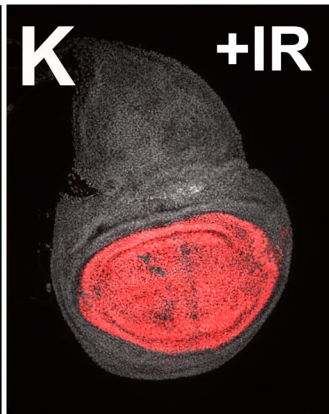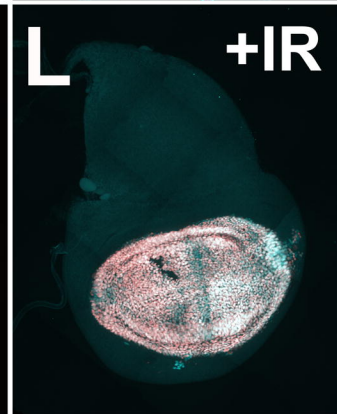

R85E08

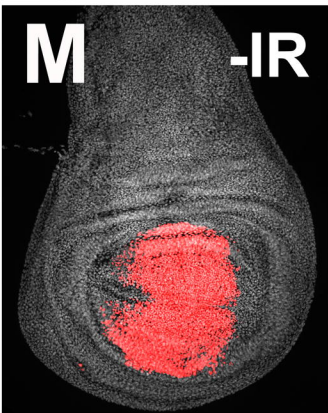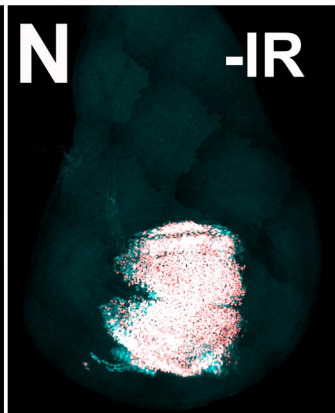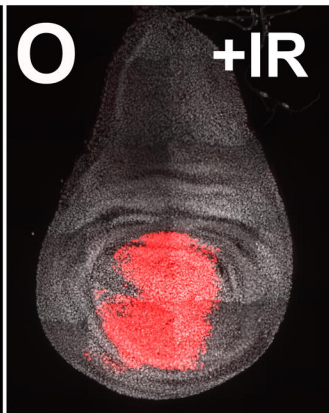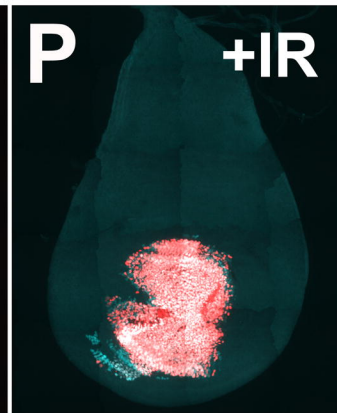



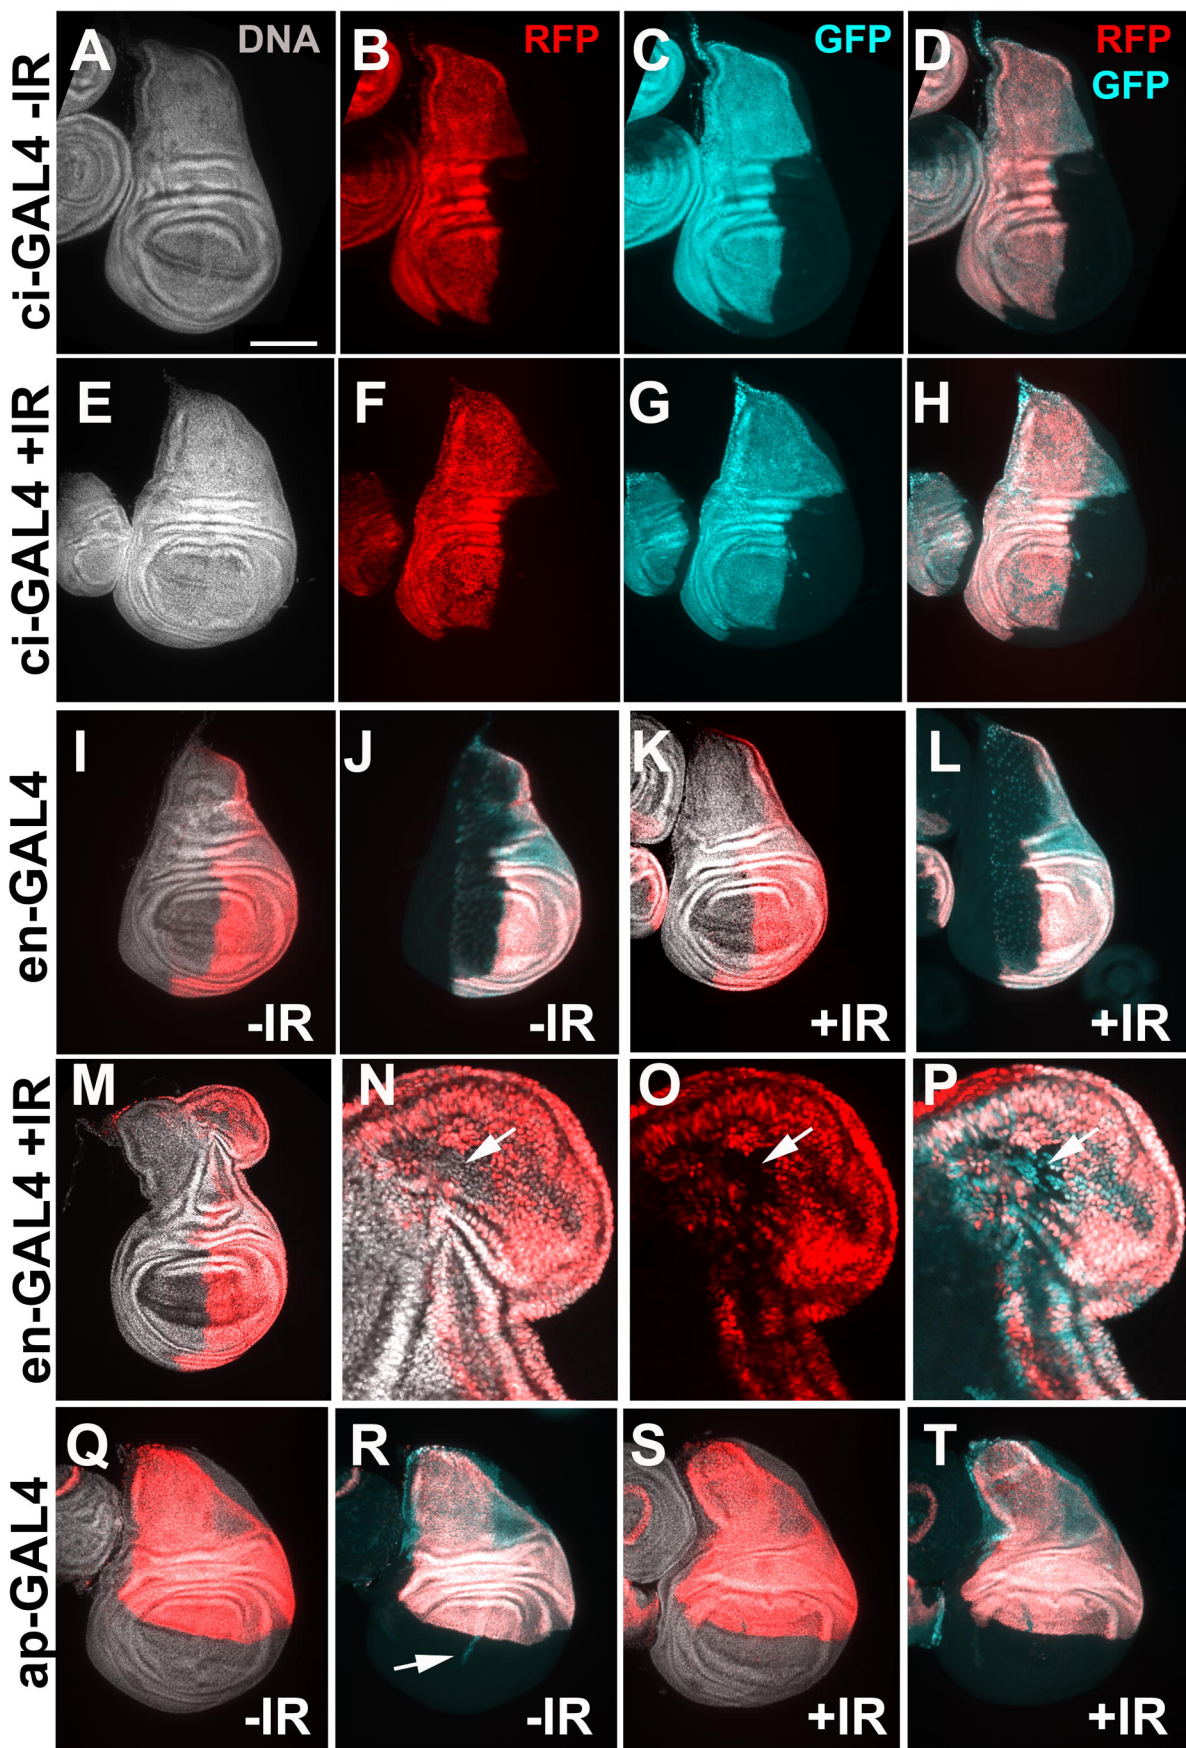

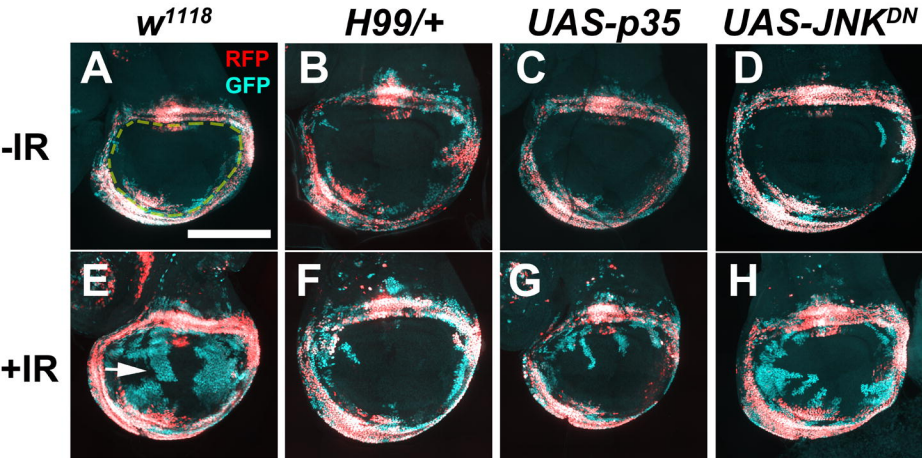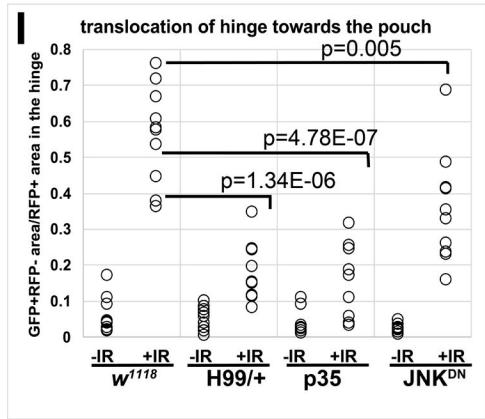

Source: http://biorxiv.org/content/10.1101/316497v1.full.pdf
